# Supplementary material
Source: PubMed Central journal article supplement (PMC5964015)
Supplement: NIHMS947518-supplement-2.pdf [file NIHMS947518-supplement-2.pdf]

## Flow Cytometry Reporting Summary

Form fields will expand as needed. Please do not leave fields blank.

### ► Data presentation

For all flow cytometry data, confirm that:

- 1. The axis labels state the marker and fluorochrome used (e.g. CD4-FITC).
- 2. The axis scales are clearly visible. Include numbers along axes only for bottom left plot of group (a 'group' is an analysis of identical markers).
- 3. All plots are contour plots with outliers or pseudocolor plots.
- 4. A numerical value for number of cells or percentage (with statistics) is provided.

### ► Methodological details

- 5. Describe the sample preparation.
- 6. Identify the instrument used for data collection.
- 7. Describe the software used to collect and analyze the flow cytometry data.
- 8. Describe the abundance of the relevant cell populations within post-sort fractions.
- 9. Describe the gating strategy used.

Tick this box to confirm that a figure exemplifying the gating strategy is provided in the Supplementary Information.
